# Supplementary material
Source: PubMed Central journal article supplement (PMC3102385)
Supplement: 1105941108_pnas.201105941SI.pdf [file 1105941108_pnas.201105941SI.pdf]

# Supporting Information

Shaw et al. 10.1073/pnas.1105941108

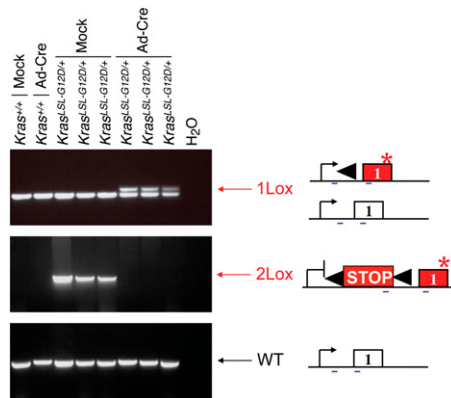

**Fig. S1.** Complete recombination of the *K-ras*<sup>LSL-G12D</sup> allele in MEFs after Adenoviral-Cre (Ad-Cre) infection. PCR genotyping of control (*K-ras*<sup>+/+</sup>) and *K-ras*<sup>LSL-G12D/+</sup> MEFs before and after Ad-Cre-mediated recombination. One control and three representative *K-ras*<sup>LSL-G12D/+</sup> MEF lines are shown. (Right) Wild-type *K-ras* allele and the genomic confirmation of the *K-ras*<sup>LSL-G12D/+</sup> allele before (2Lox) and after (1Lox) recombination. Specific PCRs confirm complete loss of the 2Lox band and gain of the 1Lox band after infection of *K-ras*<sup>LSL-G12D/+</sup> MEF lines with Ad-Cre.

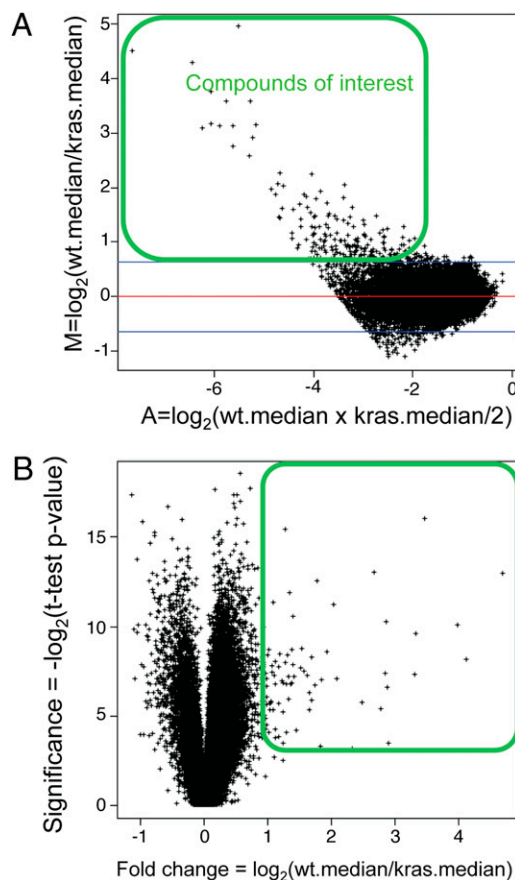

**Fig. S2.** Alternative graphical representation of primary screening results. (A) MvA plot showing an overview of the distribution of data. In simplified terms, the y axis represents fold change in viability between wild-type and *K-ras* mutant cells due to a specific compound. The greater the selectivity for mutant cells, the larger the M score. The x axis represents the product of the wild-type and mutant viability scores. Of note, compounds with selectivity for wild-type cells are not shown in this plot. (B) Plot of significance based on *P* values vs. fold change. Differential effects on cell viability were considered statistically significant if the *P* value based on *t* test was <0.05.

| Compound | Structure | IC <sub>50</sub> (μM) |                      |
|----------|-----------|-----------------------|----------------------|
|          |           | Wild-type             | Kras <sup>G12D</sup> |
| TP       |           | >40                   | 20                   |
| LP       |           | 16                    | 4                    |
| EP       |           | 64                    | 48                   |
| 2-127    |           | 20                    | 15                   |
| 2-131    |           | 40                    | 20                   |
| 2-132    |           | 30                    | 30                   |
| 2-133    |           | >40                   | 40                   |
| 2-123    |           | >40                   | 40                   |
| 2-146    |           | >40                   | >40                  |
| 2-147    |           | >40                   | >40                  |
| 2-148    |           | >40                   | >40                  |
| E10      |           | 20                    | 5                    |

**Fig. S3.** Structure-function relationships. Shown are tolperisone (TP) and 10 TP-like derivatives. Lanperisone (LP) and eperisone (EP) are commercially available. The other TP-like derivatives were synthesized. IC<sub>50</sub> values were estimated using the CTG viability assay after 48 h of drug treatment. Results shown are representative of three independent experiments.

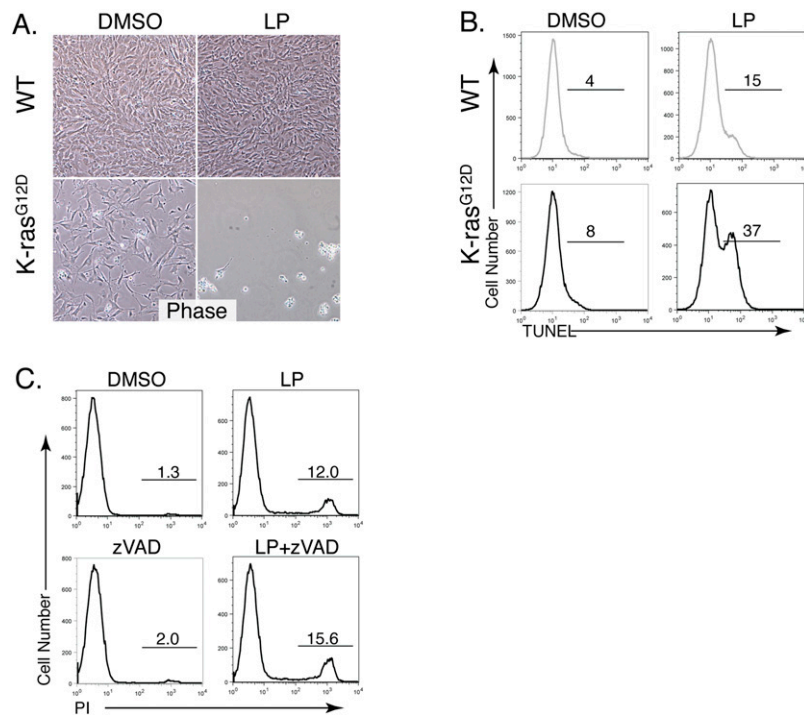

**Fig. S4.** LP induces enhanced caspase-independent death of *K-ras*<sup>G12D</sup>-expressing cells. (A) LP (20 mM, 6 h) induced phenotypes associated with death selectively in *Mox-Cre;K-ras*<sup>G12D</sup> MEFs. (B) LP (10 mM, 24 h) induces increased cell death of *Mox-Cre;K-ras*<sup>G12D</sup>-expressing MEFs as assessed by flow cytometric analysis for TUNEL. (C) Caspase inhibition with zVAD (25 min pretreatment) does not block LP (20 mM, 6 h)-induced death of *Mox-Cre;K-ras*<sup>G12D</sup>-expressing cells (assessed by flow cytometric analysis for PI).

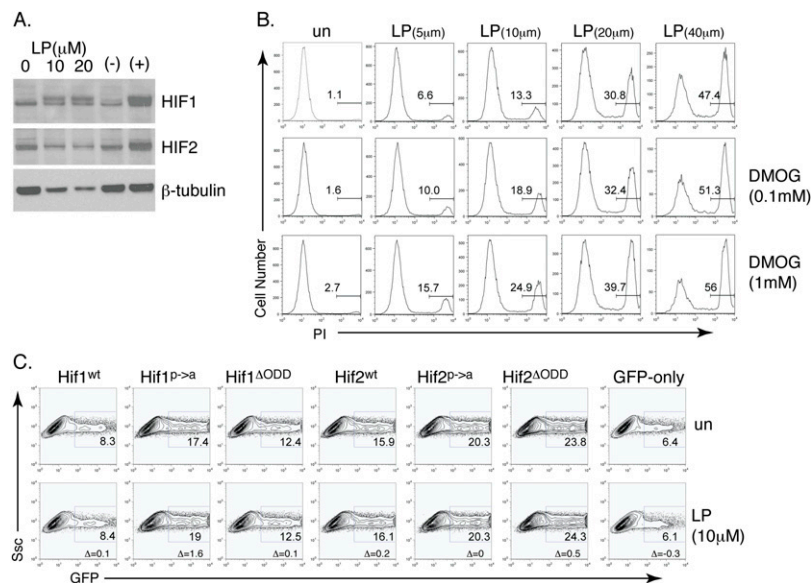

**Fig. S5.** Pharmacological and molecular modulation of HIF activity does not negatively impact LP-induced death. (A) LP treatment induces HIF-1 protein. Negative control [untreated (-)] and positive control [hypoxia (+)] lanes are shown.  $\beta$ -tubulin shows loading. (B) LP-induced death (6 h) of *Mox-Cre;K-ras*<sup>G12D</sup>-expressing fibroblasts is not blocked by the prolyl-4-hydroxylase inhibitor DMOG. Percentage of dead (PI+) cells across a LP titration is shown. (C) Expression of active or dominant-negative HIF-1 and HIF-2 does not affect LP-induced death (6 h). *Mox-Cre;K-ras*<sup>G12D</sup>-expressing fibroblasts were cotransfected with a GFP expression plasmid and the indicated HIF expression plasmids. Cells were then treated with LP or left untreated (un). If active or dominant negative HIF expression enhanced or reduced LP-induced death, the percentage of GFP+ cells in the LP-treated samples would be expected to be reduced or increased respectively. No such effects of exogenous HIF expression were observed.

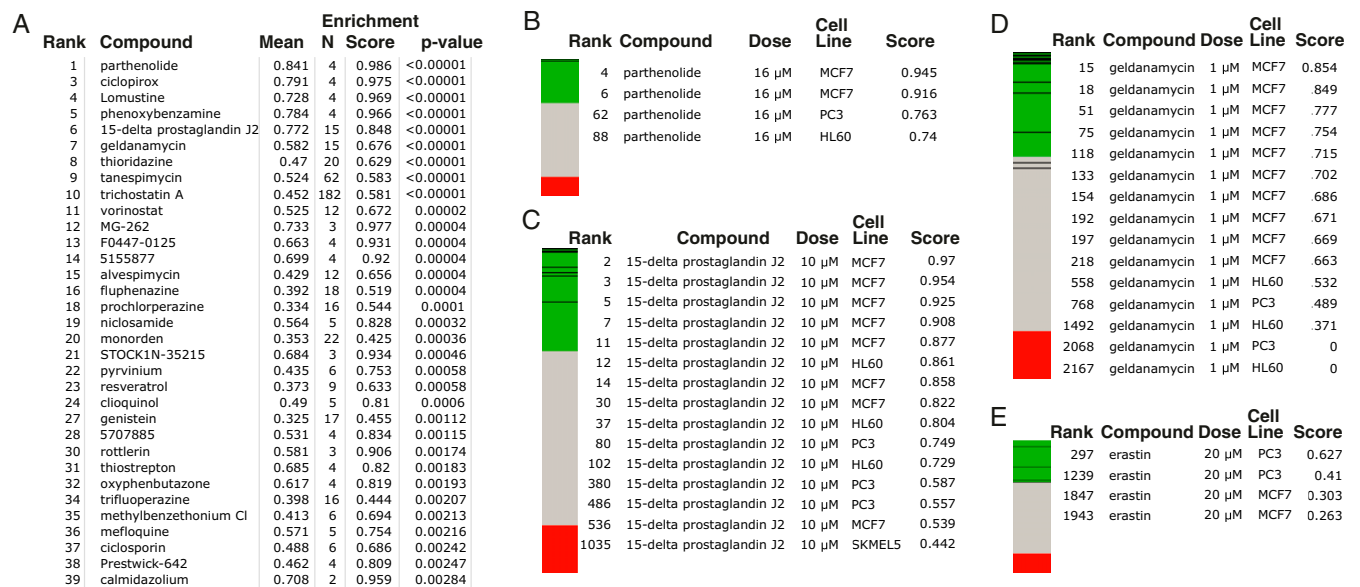

**Fig. S6.** CMAP analysis of LP treatment gene expression signatures. (A) Compounds showing high positive connectivity with LP treatment of K-ras mutant MEFs. Of note, LP treatment of wild-type MEFs showed qualitatively similar results. Mean refers to mean connectivity score of multiple instances of the same compound in the CMAP data set;  $n$ , number of instances of the identical compound in CMAP data set; the enrichment score reflects extent to which instances of a given compound are overrepresented among compound instances with the highest CMAP connectivity scores;  $P$  value reflects probability of obtaining the enrichment observed by chance (obtained by 100,000 random permutations of compound instances). (B–E) CMAP data for individual instances of parthenolide (B), 15- $\delta$ -prostaglandin J2 (C), geldanamycin (D), and erastin (E). In each figure, the red-green vertical bar depicts the list of all compound instances in the CMAP database, ranked according to their connectivity with the expression signature of LP-treated K-ras MEFs. Compound instances with the most positive connectivities are at the top of the list (green); compound instances with the most negative connectivities are at the bottom of the list (red). Within the red-green bar, each horizontal line depicts the rank of the compound instances described in the table (Right). The dose, cell line, and connectivity score are listed for each compound instance.

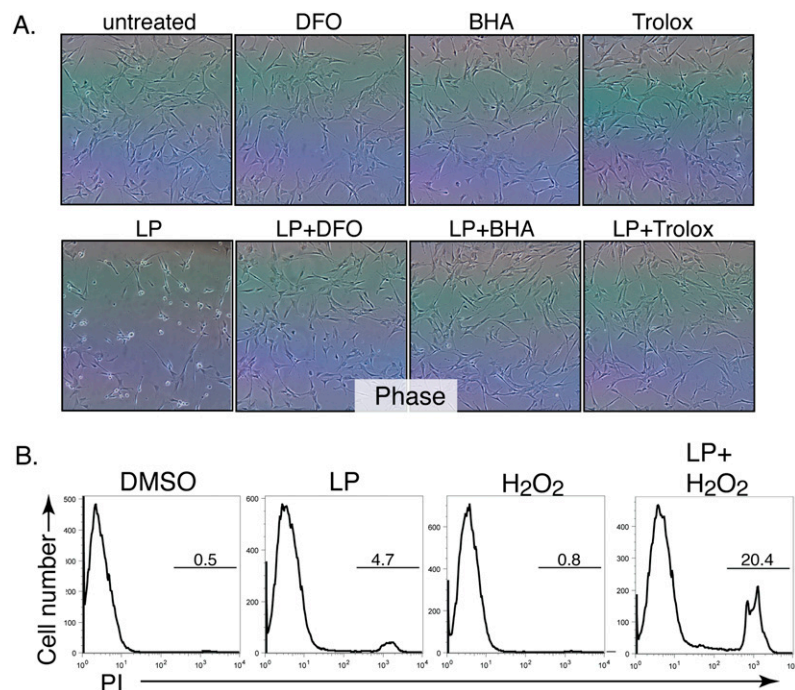

**Fig. S7.** Synergy of lanperisone with the oxidant hydrogen peroxide. (A) Suppression of LP-mediated cell death by pretreatment with antioxidants, as shown by phase contrast microscopy. *K-ras*<sup>G12D</sup> MEFs were pretreated with DMSO, DFO, BHA, or Trolox and then exposed to 20  $\mu$ M LP. (B) LP (20  $\mu$ M) and H<sub>2</sub>O<sub>2</sub> (100  $\mu$ M) synergize to induce cell death of *Mox-Cre;K-ras*<sup>G12D</sup> MEFs as assessed by flow cytometric analysis for PI. A 6-h time point is shown. Similar results were obtained comparing control *p53*<sup>-/-</sup> to *K-ras*<sup>G12D</sup>; *p53*<sup>-/-</sup> MEFs.
